# Supplementary material
Source: publisher figshare collection journal article supplement (https://karger.figshare.com/ndownloader/files/12785018)
Supplement: Supplementary file 1 [file 12785018]

| **Characteristic** | **Median (range) or percentage** |
| --- | --- |
| *Singleton pregnancies (n=112)* |  |
| Maternal age (years) | 32.9 (18.9-42.7) |
| Gravidity | 2 (1-10) |
| Parity |  |
| 0 | 62.5% |
| 1 | 27.7% |
| ≥ 2 | 9.8% |
| Miscarriages ≥ 2 | 25.9% |
| Conception mode |  |
| Natural | 70.5% |
| IVF or IVF/ICSI | 27.7% |
| Intrauterine insemination | 1.8% |
| Gestational diabetes | 5.4% |
| Hypertensive disorders | 8.9% |
| Small-for-gestational age | 3.6% |
| *Newborns (n=112)* |  |
| Female | 52.7% |
| Birth weight (grams) | 3390 (450-4700) |
| GA at delivery (weeks) | 39+4 (26+4 – 42+0) |

*Table S1: general characteristics of the study population*
